# Supplementary material
Source: ML conference proceedings conference paper supplement (https://proceedings.neurips.cc/paper_files/paper/2018/hash/3d863b367aa379f71c7afc0c9cdca41d-Abstract.html)
Supplement: Supplementary file [file 3d863b367aa379f71c7afc0c9cdca41d-Supplemental.zip]

## Early Stopping for Nonparametric Testing

### A Proof

#### A.1 Proof of Theorem 3.1

Denote  $\gamma^t = \frac{1}{\sqrt{n}} U^\top \mathbf{f}_t$ , then  $\mathbf{f}_t = \sqrt{n} U \gamma^t$ . The recursion equation of the gradient descent algorithm in (2.3) is equivalent to

$$\sqrt{n} U \gamma^{t+1} = \sqrt{n} U \gamma^t - \sqrt{n} \alpha_t \mathbf{K} U \gamma^t + \alpha_t \mathbf{K} \mathbf{y}. \quad (\text{A.1})$$

Note that  $\mathbf{y} = \mathbf{f}^* + \epsilon = \sqrt{n} U \gamma^* + \sqrt{n} w$ , where  $\mathbf{f}^* = (f^*(x_1), \dots, f^*(x_n)) = \sqrt{n} U \gamma^*$ ,  $\epsilon = (\epsilon_1, \dots, \epsilon_n)^\top$ , and  $w = \frac{\epsilon}{\sqrt{n}}$ . For theoretical convenience, we suppose  $\sigma = 1$ . Then (A.1) becomes

$$\gamma^{t+1} = \gamma^t - \alpha_t \Lambda \gamma^t + \alpha_t \Lambda \gamma^* + \alpha_t w. \quad (\text{A.2})$$

Recall the diagonal shrinkage matrices  $S^t$  at step  $t$  is defined as follows

$$S^t = \prod_{\tau=0}^{t-1} (I_n - \alpha_\tau \Lambda) \in \mathbb{R}^{n \times n}.$$

Then based on (A.2), we have

$$\gamma^t - \gamma^* = (I - S^t) w - S^t \gamma^*. \quad (\text{A.3})$$

The test statistics  $D_{n,t}$  can be written as

$$D_{n,t} = \|\mathbf{f}_t\|_n^2 = \frac{1}{n} \mathbf{f}_t^\top \mathbf{f}_t = \gamma^{t\top} \gamma^t = \|\gamma^t\|_2^2, \quad (\text{A.4})$$

where  $\|\cdot\|_2$  is the Euclidean norm. Next, we analyze the null limiting distribution of  $\|\gamma^t\|_2^2$ . Under the null hypothesis,  $\gamma^* = 0$ , plugging (A.3) in (A.4), we have  $D_{n,t} = \|\gamma^t\|_2^2 = w^\top (I_n - S^t)^2 w = \frac{1}{n} \epsilon^\top (I_n - S^t)^2 \epsilon$ .

We first derive the null limiting distribution of  $D_{n,t}$  conditional on  $\mathbf{x}$ . By the Gaussian assumption of  $\epsilon$ , we have  $\mu_{n,t} \equiv \frac{1}{n} \text{tr}((I_n - S^t)^2)$  and  $\sigma_{n,t}^2 \equiv \frac{2}{n^2} \text{tr}((I_n - S^t)^4)$ . Define  $U = \frac{D_{n,t} - \mu_{n,t}}{\sigma_{n,t}}$ , then for any  $k \in (-1/2, 1/2)$ , we have

$$\begin{aligned} & \log E_\epsilon (\exp(ikU)) \\ &= \log E_\epsilon (\exp(ik \epsilon^\top (I_n - S^t)^2 \epsilon / (n \sigma_{n,t}))) - ik \mu_{n,t} / (n \sigma_{n,t}) \\ &= -\frac{1}{2} \log \det(I_n - 2ik(I_n - S^t)^2 / (n \sigma_{n,t})) - ik \mu_{n,t} / (n \sigma_{n,t}) \\ &= ik \cdot \text{tr}((I_n - S^t)^2) / (n \sigma_{n,t}) - k^2 \text{tr}((I_n - S^t)^4) / (n^2 \sigma_{n,t}^2) \\ &\quad + \mathcal{O}(k^3 \text{tr}((I_n - S^t)^6) / (n^3 \sigma_{n,t}^3)) - ik \mu_{n,t} / (n \sigma_{n,t}) \\ &= -k^2/2 + \mathcal{O}(k^3 \text{tr}((I_n - S^t)^6) / (n^3 \sigma_{n,t}^3)), \end{aligned}$$

where  $i = \sqrt{-1}$ ,  $E_\epsilon$  is the expectation with respect to  $\epsilon$ , and  $I_n$  is  $n \times n$  identity matrix. Therefore, to prove the normality of  $U$ , we need to show  $\text{tr}((I_n - S^t)^6) / (n^3 \sigma_{n,t}^3) = o_P(1)$ .

Note that  $S^t = \prod_{\tau=0}^{t-1} (I_n - \alpha_\tau \Lambda) = \text{diag}(S_{11}^t, \dots, S_{nn}^t)$ , where  $S_{jj}^t = \prod_{\tau=0}^{t-1} (1 - \alpha_\tau \hat{\mu}_j)$  for  $j = 1, \dots, n$ . Then  $\text{tr}((I_n - S^t)^6) = \sum_{j=1}^n (1 - S_{jj}^t)^6$ ,  $\text{tr}((I_n - S^t)^4) = \sum_{j=1}^n (1 - S_{jj}^t)^4$ , and

$$\frac{\text{tr}((I_n - S^t)^6)}{n^3 \sigma_{n,t}^3} = \frac{\text{tr}((I_n - S^t)^6)}{\text{tr}((I_n - S^t)^4)} \cdot \frac{1}{\sqrt{\text{tr}((I_n - S^t)^4)}} \leq \frac{1}{\sqrt{\text{tr}((I_n - S^t)^4)}},$$

where the last step is by Lemma A.2 that  $(1 - S_{jj}^t) \asymp \min\{1, \eta_t \hat{\mu}_j\} \leq 1$ . Then, it is sufficient to prove  $\text{tr}((I_n - S^t)^4) \rightarrow \infty$  as  $n \rightarrow \infty$  and  $t \rightarrow \infty$ .

Let  $\tilde{\kappa}_t = \operatorname{argmin}\{j : \hat{\mu}_j \leq \frac{1}{\eta_t}\} - 1$ , then

$$\begin{aligned} \operatorname{tr}((I - S^t)^4) &= \sum_{j=1}^n (1 - S_{jj}^t)^4 \geq \frac{1}{2^4} \sum_{j=1}^n (\min\{1, \eta_t \hat{\mu}_j\})^4 \\ &= \frac{1}{2^4} (\tilde{\kappa}_t + \sum_{j=\tilde{\kappa}_t+1}^n (\eta_t \hat{\mu}_j)^4) \geq \frac{\tilde{\kappa}_t}{2^4}. \end{aligned} \quad (\text{A.5})$$

Therefore, when  $n \rightarrow \infty$  and  $t \rightarrow \infty$ , by Assumption A2, we have  $\eta_t \rightarrow \infty$ ; and by Assumption A3 and Lemma 3.1 in Liu et al. [2018], we have  $\tilde{\kappa}_t \rightarrow \infty$  with probability greater than  $1 - e^{-c\kappa_t}$ , where  $c$  is a constant. Then  $E_\epsilon(e^{ikU}) \rightarrow e^{-\frac{k^2}{2}}$  with probability approaches 1 as  $n \rightarrow \infty$  and  $t \rightarrow \infty$ .

We next consider  $E_{\mathbf{x}} E_\epsilon(e^{ikU})$  by taking expectation w.r.t  $\mathbf{x}$  on  $E_\epsilon(e^{ikU})$ . We claim  $E_{\mathbf{x}} E_\epsilon(e^{ikU}) \rightarrow e^{-\frac{k^2}{2}}$  for  $k \in (-\frac{1}{2}, \frac{1}{2})$ . If not, there exists a subsequence of r.v  $\{\mathbf{x}_{n_k}\}$ , such that for  $\forall \varepsilon > 0$ ,  $|E_{\mathbf{x}_{n_k}} E_\epsilon(e^{ikU}) - e^{-\frac{k^2}{2}}| > \varepsilon$ . On the other hand, since  $E_\epsilon e^{ikU(\mathbf{x}_{n_k})} \xrightarrow{P} e^{-\frac{k^2}{2}}$ , which is bounded, there exists a sub-sub sequence  $\{\mathbf{x}_{n_{k_l}}\}$ , such that

$$E_\epsilon e^{ikU(\mathbf{x}_{n_{k_l}})} \xrightarrow{a.s.} e^{-\frac{k^2}{2}}.$$

Thus by dominate convergence theorem,  $E_{\mathbf{x}_{n_{k_l}}} E_\epsilon e^{ikU} \rightarrow e^{-\frac{k^2}{2}}$ , which is a contradiction. Therefore, we have  $U = \frac{D_{n,t} - \mu_{n,t}}{\sigma_{n,t}}$  asymptotically converges to a standard normal distribution.

## A.2 Proof of Theorem 3.3 (a)

*Proof.* Recall  $\|f_t\|_n^2 = \gamma^t{}^\top \gamma^t$  with  $\gamma^t = (I - S^t)\epsilon/\sqrt{n} + (I - S^t)\gamma^*$ . Therefore,

$$\gamma^t{}^\top \gamma^t = \frac{1}{n} \epsilon^\top (I - S^t)^2 \epsilon + \frac{2}{\sqrt{n}} \epsilon^\top (I - S^t)^2 \gamma^* + \gamma^*{}^\top (I - S^t)^2 \gamma^* = W_1 + W_2 + W_3. \quad (\text{A.6})$$

For  $W_3$ , since  $\|f^*\|_n^2 = \|\gamma^*\|_2^2 \geq C_\varepsilon^2 d_{n,t}^2$ ,

$$W_3 = \|(I - S^t)\gamma^*\|_2^2 \geq \frac{1}{2} \|\gamma^*\|_2^2 - \|S^t \gamma^*\|_2^2 \geq \frac{C_\varepsilon^2}{2} \left( \frac{1}{\eta_t} + \sigma_{n,t} \right) - \frac{1}{e\eta_t} \geq \frac{C_\varepsilon^2 \sigma_{n,t}}{2},$$

where  $C_\varepsilon^2 \geq \frac{2}{e}$  is a constant, and the specific requirement of  $C_\varepsilon^2$  will be illustrated later.

Recall  $W_2 = \frac{1}{\sqrt{n}} \epsilon^\top (I - S^t)^2 \gamma^*$ . Consider  $a^\top (I - S^t)^2 a$ , where  $a = (a_1, \dots, a_n) \in \mathbb{R}^n$  is an arbitrary vector. Then  $a^\top (I - S^t)^2 a \leq \lambda_{\max}((I - S^t)^2) a^\top a \leq a^\top a$ . For  $W_2$ , we have

$$E_\epsilon W_2^2 = \gamma^*{}^\top (I - S^t)^4 \gamma^* \leq \gamma^*{}^\top (I - S^t)^2 \gamma^* = W_3.$$

Then

$$\mathbb{P}\left(|W_2| \geq \varepsilon^{-\frac{1}{2}} W_3^{1/2}\right) \leq \frac{E_\epsilon W_2^2}{\varepsilon^{-1} W_3} \leq \varepsilon \quad (\text{A.7})$$

Define  $\mathcal{E}_1 = \{\frac{W_1 - \mu_{n,t}}{\sigma_{n,t}} \leq C'_\varepsilon\}$ , where  $C'_\varepsilon$  satisfies  $\mathbb{P}(\mathcal{E}_1 | \mathbf{x}) \geq 1 - \varepsilon$  for any  $t \geq t_\varepsilon$  and  $n \geq N_\varepsilon$ , with probability greater than  $1 - e^{-c\kappa_t}$ . Also define  $\mathcal{E}_2 = \{W_2 \geq -\varepsilon^{-1/2} W_3^{1/2}\}$  and  $\mathcal{E}_3 = \{W_3 \geq C_\varepsilon^2 \sigma_{n,t}/2\}$ . Finally, with probability greater than  $1 - e^{-c\kappa_t}$ ,

$$\begin{aligned} &\mathbb{P}_f\left(\frac{W_1 + W_2 + W_3 - \mu_{n,t}}{\sigma_{n,t}} \geq z_{1-\alpha/2} | \mathbf{x}\right) \\ &\geq \mathbb{P}_f\left(\frac{W_2 + W_3}{\sigma_{n,t}} + \frac{W_1 - \mu_{n,t}}{\sigma_{n,t}} \geq z_{1-\alpha/2}, \mathcal{E}_1 \cap \mathcal{E}_2 \cap \mathcal{E}_3 | \mathbf{x}\right) \\ &\geq \mathbb{P}_f\left(\frac{W_3(1 - \varepsilon^{-1/2} W_3^{-1/2})}{\sigma_{n,t}} - C'_\varepsilon \geq z_{1-\alpha/2}, \mathcal{E}_1 \cap \mathcal{E}_2 \cap \mathcal{E}_3 | \mathbf{x}\right) \\ &\geq \mathbb{P}_f\left(C_\varepsilon(1 - \frac{1}{\sqrt{C_\varepsilon \sigma_{n,t} \varepsilon}}) - C'_\varepsilon \geq z_{1-\alpha/2}, \mathcal{E}_1 \cap \mathcal{E}_2 \cap \mathcal{E}_3 | \mathbf{x}\right) \\ &= \mathbb{P}_f(\mathcal{E}_1 \cap \mathcal{E}_2 \cap \mathcal{E}_3 | \mathbf{x}) \\ &\geq 1 - 2\varepsilon \end{aligned}$$

The second to the last equality is achieved by choosing  $C_\varepsilon$  to satisfy

$$\frac{1}{\sqrt{C_\varepsilon \sigma_{n,t} \varepsilon}} < \frac{1}{2} \quad \text{and} \quad \frac{1}{2} C_\varepsilon - C'_\varepsilon \geq z_{1-\alpha/2}.$$

□

### A.3 Proof of Corollary 3.4 and Corollary 3.5

We first prove Corollary 3.4.

*Proof.* By the stopping rule (3.1), at  $T^*$ , we have

$$\frac{1}{\eta_{T^*}} \asymp \frac{1}{n} \sqrt{\sum_{i=1}^n \min\{1, \eta_{T^*} \hat{\mu}_i\}}.$$

On the other hand, suppose  $T^* < n$ , then with probability at least  $1 - e^{-C\kappa_{T^*}}$ ,

$$\sum_{i=1}^n \min\{1, \eta_{T^*} \hat{\mu}_i\} = \tilde{\kappa}_{T^*} + \eta_{T^*} \sum_{i=\tilde{\kappa}_{T^*}+1}^n \hat{\mu}_i \asymp \tilde{\kappa}_{T^*},$$

the last step is by Lemma A.4. Then we have

$$\frac{1}{\eta_{T^*}} \asymp \frac{\sqrt{\tilde{\kappa}_{T^*}}}{n}.$$

By Lemma A.5 (a), with probability at least  $1 - e^{-c_m n \kappa_{T^*}^{-4m/(2m-1)}}$ ,  $\tilde{\kappa}_{T^*} \asymp \kappa_{T^*}$ . Then  $\frac{1}{\eta_{T^*}} \asymp \frac{\sqrt{\kappa_{T^*}}}{n}$  with  $\kappa_{T^*}$  satisfies  $(\kappa_{T^*})^{-2m} \asymp \frac{1}{\eta_{T^*}}$ . Finally we have  $\eta_{T^*} \asymp n^{4m/(4m+1)}$ , and  $d_n^* \asymp n^{-2m/(4m+1)}$ .

Corollary 3.5 can be achieved similarly.

□

### A.4 Proof of Theorem 3.6

(1) We first consider the case when  $t \ll T^*$ .

*Proof.* Suppose the “true” function  $f(\cdot) = f^*(\cdot) = \sum_{i=1}^n K(x_i, \cdot) w_i$ , then  $\mathbf{f}^* = (f^*(x_1), \dots, f^*(x_n)) = n\mathbf{K}\mathbf{w}$ , where  $\mathbf{w} = (w_1, \dots, w_n)$ . Let  $\mathbf{w} = U\boldsymbol{\alpha}$ , then  $\mathbf{f}^* = nUD\boldsymbol{\alpha}$ , where  $\boldsymbol{\alpha} = (\alpha_1, \dots, \alpha_n)$ . We construct  $f^*(\cdot)$  with the coefficients  $\{\alpha_\nu\}_{\nu=1}^n$  satisfies

$$\alpha_\nu^2 = \begin{cases} \frac{C}{2n(\kappa_t-1)} \mu_{g\kappa_t+k}^{-1} & \text{for } \nu = (g\kappa_t + k) \quad k = 1, 2, \dots, \kappa_t - 1 \\ 0 & \text{otherwise} \end{cases} \quad (\text{A.8})$$

Since  $t \ll T^*$ , by the definition of  $\kappa_t$ , we have  $\kappa_t < \kappa_{T^*}$ . Choose  $g \geq 1$  to be an integer satisfying  $(g+1)\kappa_t \leq \kappa_{T^*}$  and  $n\eta_t^2 \mu_{g\kappa_t}^3 \ll \kappa_t^{1/2}$ . The existence of such  $g$  can be verified directly based on the expression of the PDK and EDK eigenvalues.

Note that  $\frac{1}{n} < \frac{1}{\eta_{T^*}} < \frac{1}{\eta_t}$ , then by Lemma A.5, we have  $\frac{1}{2} \mu_{g\kappa_t} \leq \hat{\mu}_{g\kappa_t} \leq \frac{3}{2} \mu_{g\kappa_t}$  with probability approaches 1. Consider the event  $\mathcal{A} = \{|\hat{\mu}_{g\kappa_t} - \mu_{g\kappa_t}| \leq \frac{1}{2} \mu_{g\kappa_t}\}$ , then  $P(\mathcal{A}) \rightarrow 1$  as  $n \rightarrow \infty$ . Conditional on the event  $\mathcal{A}$ , we have

$$\|f\|_{\mathcal{H}}^2 = \left\| \sum_{i=1}^n K(x_i, \cdot) w_i \right\|_{\mathcal{H}}^2 = n\boldsymbol{\alpha}^\top D\boldsymbol{\alpha} = n \sum_{k=1}^{\kappa_t-1} \alpha_{g\kappa_t+k}^2 \hat{\mu}_{g\kappa_t+k} \leq C.$$

Furthermore, conditional on  $\mathcal{A}$ ,

$$\|f\|_n^2 = n\boldsymbol{\alpha}^\top D^2\boldsymbol{\alpha} = n \sum_{k=1}^{\kappa_t-1} \alpha_{g\kappa_t+k}^2 \hat{\mu}_{g\kappa_t+k}^2 \geq \frac{C}{4} \hat{\mu}_{(g+1)\kappa_t} \gg \hat{\mu}_{\kappa_{T^*}} \geq \frac{1}{\eta_{T^*}} = d_n^*.$$

By (A.6), we have

$$D_{n,t} = \|f_t\|_n^2 = \frac{1}{n} \epsilon^\top (I - S^t)^2 \epsilon + \frac{2}{\sqrt{n}} \epsilon^\top (I - S^t)^2 \gamma^* + \gamma^* (I - S^t)^2 \gamma^* = W_1 + W_2 + W_3,$$

where  $\gamma^* = \frac{1}{\sqrt{n}} U^\top \mathbf{f}^*$ . Note that

$$W_3 = \gamma^* (I - S^t)^2 \gamma^* = n \sum_{i=1}^n \alpha_i^2 \hat{\mu}_i^2 (1 - S_{ii}^t)^2 \leq \frac{C \eta_t^2}{\kappa_t - 1} \sum_{k=1}^{\kappa_t - 1} \hat{\mu}_{g\kappa_t + k}^3 \leq C \eta_t^2 \hat{\mu}_{g\kappa_t}^3,$$

where the first inequality is based on the property of shrinkage matrices  $S^t$  in Lemma A.2. Conditional on the event  $\mathcal{A}$ , we have

$$W_3 \leq C \eta_t^2 \hat{\mu}_{g\kappa_t}^3 \leq \frac{27C}{8} \eta_t^2 \mu_{g\kappa_t}^3 \ll \kappa_t^{1/2}/n,$$

where the last step is by the property on the integer  $g$ . Then we have  $W_3 = o(\sigma_{n,t})$ . By (A.7), we have  $W_2 = W_1^{1/2} O_{P_f}(1) = o_{P_f}(\sigma_{n,t})$ . Therefore,

$$\begin{aligned} \frac{D_{n,t} - \mu_{n,t}}{\sigma_{n,t}} &= \frac{W_1 - \mu_{n,t}}{\sigma_{n,t}} + \frac{W_2 + W_3}{\sigma_{n,t}} \\ &= \frac{W_1 - \mu_{n,t}}{\sigma_{n,t}} + o_{P_f}(\sigma_{n,t}) \\ &\xrightarrow{d} N(0, 1). \end{aligned}$$

Then we have, as  $n \rightarrow \infty$ , with probability approaches 1,

$$\inf_{f \in \mathcal{B}, \|f\|_n \geq C' d_n^*} \mathbf{P}_f(\phi_{n,t} = 1 | \mathbf{x}) \leq \mathbf{P}_f(\phi_{n,t} = 1 | \mathbf{x}) \rightarrow \alpha.$$

□

(2) We next consider the case when  $t \gg T^*$ .

*Proof.* We still suppose the true function  $f(\cdot) = f^*(\cdot) = \sum_{i=1}^n K(x_i, \cdot) w_i$ , then  $\mathbf{f}^* = n \mathbf{K} \mathbf{w}$ , where  $\mathbf{w} = (w_1, \dots, w_n)$ . Let  $\mathbf{w} = U \boldsymbol{\alpha}$ , then  $\mathbf{f}^* = n U D \boldsymbol{\alpha}$ , where  $\boldsymbol{\alpha} = (\alpha_1, \dots, \alpha_n)$ . Construct the coefficients  $\alpha_\nu$  satisfying

$$\alpha_\nu^2 = \begin{cases} \frac{C_1}{n} \frac{1}{\eta_{T^*}} \mu_\nu^{-2} & \text{for } \nu = 1; \\ 0 & \text{otherwise.} \end{cases} \quad (\text{A.9})$$

Here  $C_1$  is a constant independent with  $n$ . In the following analysis, we conditional on the event  $\mathcal{A} = \{|\hat{\mu}_1 - \mu_1| \leq \frac{1}{2} \mu_1\}$ . First,

$$\|f\|_{\mathcal{H}}^2 = \left\| \sum_{i=1}^n K(x_i, \cdot) w_i \right\|_{\mathcal{H}}^2 = n \boldsymbol{\alpha}^\top D \boldsymbol{\alpha} = n \alpha_1^2 \hat{\mu}_1 \leq \frac{3C_1}{2\eta_{T^*}} \mu_1^{-1} \leq C.$$

The last inequality is based on the fact that  $\eta_{T^*} \rightarrow \infty$  as  $n \rightarrow \infty$ . Furthermore,

$$\|f\|_n^2 = n \boldsymbol{\alpha}^\top D^2 \boldsymbol{\alpha} = n \alpha_1^2 \hat{\mu}_1^2 \geq \frac{C_1}{4\eta_{T^*}} \geq C_2 d_n^*,$$

with  $C_1$  satisfying  $C_1/4 \geq C_2$ . By (A.6), we have

$$D_{n,t} = \|f_t\|_n^2 = \frac{1}{n} \epsilon^\top (I - S^t)^2 \epsilon + \frac{2}{\sqrt{n}} \epsilon^\top (I - S^t)^2 \gamma^* + \gamma^* (I - S^t)^2 \gamma^* = W_1 + W_2 + W_3,$$

where  $\gamma^* = \frac{1}{\sqrt{n}} U^\top \mathbf{f}^*(\mathbf{x})$ . Note that

$$W_3 = \gamma^* (I - S^t)^2 \gamma^* = n \sum_{i=1}^n \alpha_i^2 \hat{\mu}_i^2 (1 - S_{ii}^t)^2 \leq n \alpha_1^2 \hat{\mu}_1^2 \leq \frac{9C_1}{4\eta_{T^*}}$$

$$\ll \sigma_{n,t} = \frac{1}{n} \sqrt{\sum_{i=1}^n \min\{1, \eta_t \hat{\mu}_i\}},$$

then we have  $W_3 = o(\sigma_{n,t})$ . By (A.7), we have  $W_2 = W_1^{1/2} O_{P_f}(1) = o_{P_f}(\sigma_{n,t})$ . Therefore,

$$\begin{aligned} \frac{D_{n,t} - \mu_{n,t}}{\sigma_{n,t}} &= \frac{W_1 - \mu_{n,t}}{\sigma_{n,t}} + \frac{W_2 + W_3}{\sigma_{n,t}} \\ &= \frac{W_1 - \mu_{n,t}}{\sigma_{n,t}} + o_{P_f}(\sigma_{n,t}) \\ &\xrightarrow{d} N(0, 1). \end{aligned}$$

Since  $P(\mathcal{A}) \rightarrow 1$  as  $n \rightarrow \infty$ , we have, as  $n \rightarrow \infty$ , with probability approaches 1,

$$\inf_{f \in \mathcal{B}, \|f\|_n \geq C' d_n^*} P_f(\phi_{n,t} = 1 | \mathbf{x}) \leq P_{f^*}(\phi_{n,t} = 1 | \mathbf{x}) \rightarrow \alpha.$$

□

## A.5 Proof of Sharpness in estimation

*Proof.* We first prove Theorem 4.2 (a) for PDK.

Suppose the true function  $f(\cdot) = f^*(\cdot) = \sum_{i=1}^n K(x_i, \cdot) w_i$ , then  $\mathbf{f}^* = n\mathbf{K}\mathbf{w}$ , where  $\mathbf{w} = (w_1, \dots, w_n)$ . Let  $\mathbf{w} = U\boldsymbol{\alpha}$ , then  $\mathbf{f}^* = nUD\boldsymbol{\alpha}$ , where  $\boldsymbol{\alpha} = (\alpha_1, \dots, \alpha_n)$ . Define  $\check{\kappa}_t = \text{argmin}\{j : \mu_j < \frac{1}{3\eta_t}\} - 1$ , and we construct  $f^*$  with the coefficients  $\alpha_\nu$  satisfying

$$\alpha_\nu^2 = \begin{cases} \frac{C}{2n} \frac{1}{\check{\kappa}_t} \mu_{\check{\kappa}_t+k}^{-1} & \text{for } \nu = \check{\kappa}_t + k, k = 1, \dots, \check{\kappa}_t/2; \\ 0 & \text{otherwise.} \end{cases} \quad (\text{A.10})$$

When  $\eta_{\tilde{T}} = n^{2m/(2m+1)}$ , then  $\kappa_{\tilde{T}} = \text{argmin}\{j : \mu_j < \frac{1}{\eta_{\tilde{T}}}\} - 1 \lesssim n^{1/(2m+1)}$  by direct calculation with  $\mu_i \asymp i^{-2m}$ . Since  $t \ll \tilde{T}$ , by Assumption A2,  $\eta_t \ll \eta_{\tilde{T}}$ , then we have  $\check{\kappa}_t \leq \kappa_{\tilde{T}} \lesssim n^{1/(2m+1)}$  and  $3\check{\kappa}_t/2 < n$ .

Condition on the event  $\mathcal{A} = \{|\hat{\mu}_i - \mu_i| \leq \frac{1}{2}\mu_i\}$ , it is easy to see

$$\|f\|_{\mathcal{H}}^2 = n\boldsymbol{\alpha}^\top D\boldsymbol{\alpha} \leq C.$$

Note that

$$\begin{aligned} \|f_t - f^*\|_n^2 &= \|\mathbb{E}_\epsilon f_t - f^*\|_n^2 + \|f_t - \mathbb{E}_\epsilon f_t\|_n^2 + \frac{2}{n} (\mathbf{f}_t - \mathbb{E}_\epsilon \mathbf{f}_t)^\top (\mathbb{E}_\epsilon \mathbf{f}_t - \mathbf{f}^*) \\ &\equiv W_1 + W_2 + W_3. \end{aligned} \quad (\text{A.11})$$

Consider the bias term  $W_1$ , since  $\mathbf{f}_t = \sqrt{n}U\boldsymbol{\gamma}^t$  with  $\boldsymbol{\gamma}^t = (I - S^t)\mathbf{w} - (I - S^t)\boldsymbol{\gamma}^*$ , where  $\boldsymbol{\gamma}^* = \sqrt{n}D\boldsymbol{\alpha}$ , we have

$$W_1 = \|\boldsymbol{\gamma}^t - \boldsymbol{\gamma}^*\|_2^2 = \boldsymbol{\gamma}^{*\top} S^2 \boldsymbol{\gamma}^* = n\boldsymbol{\alpha}^\top D^2 S^2 \boldsymbol{\alpha} = n \sum_{i=1}^n \alpha_i^2 \hat{\mu}_i^2 S_{ii}^2$$

By Lemma A.2, we have  $S_{ii}^t \geq 1 - \min\{1, \eta_t \hat{\mu}_i\}$ . Condition on the event  $\mathcal{A} = \{|\hat{\mu}_i - \mu_i| \leq \frac{1}{2}\mu_i\}$ , we have  $\eta_t \hat{\mu}_{\check{\kappa}_t+1} \leq \frac{3}{2}\eta_t \mu_{\check{\kappa}_t+1} \leq \frac{1}{2}$ , then  $0 \leq \min\{1, \eta_t \hat{\mu}_i\} < \frac{1}{2}$  for  $i = \check{\kappa}_t + 1, \dots, \check{\kappa}_t + \check{\kappa}_t/2$ . Then

$$\begin{aligned} W_1 &\geq n \sum_{i=1}^n \alpha_i^2 \hat{\mu}_i^2 (1 - \min\{1, \eta_t \hat{\mu}_i\})^2 \geq \frac{n}{4} \sum_{k=1}^{\check{\kappa}_t/2} \alpha_{\check{\kappa}_t+k}^2 \hat{\mu}_{\check{\kappa}_t+k}^2 \\ &\geq \sum_{k=1}^{\check{\kappa}_t/2} \frac{C}{8\check{\kappa}_t} \hat{\mu}_{\check{\kappa}_t+k} \geq \frac{C}{16} \hat{\mu}_{\frac{3\check{\kappa}_t}{2}} \geq \frac{C}{32} \mu_{\frac{3\check{\kappa}_t}{2}} \geq c_m (\check{\kappa}_t)^{-2m} \geq c'_m \mu_{\check{\kappa}_t} \geq \frac{c'_m}{3\eta_t}, \end{aligned}$$

where the sixth inequality is based on the PDK's property that  $\mu_i \asymp i^{-2m}$ ,  $c_m, c'_m$  are constants depend on  $m$ .

On the other hand, by Lemma A.3,  $W_1 \lesssim \frac{1}{\eta_t}$ . Therefore,  $W_1 = \mathcal{O}_P(\frac{1}{\eta_t})$ . Furthermore, by the proof of Lemma A.1, we have  $W_2 = \mathcal{O}_P(\mu_{n,t})$ . By the stopping rule defined in (4.1), when  $t \ll \tilde{T}$ ,  $\frac{1}{\eta_t} \gg \mu_{n,t}$ . Then we have  $W_2 = o_P(W_1)$ , and  $W_3 = o_P(W_1)$  due to Cauchy-Schwarz inequality  $W_3 \leq W_1^{1/2} W_2^{1/2}$ . Finally, by Lemma A.5, with probability approaching 1,

$$\sup_{f \in \mathcal{B}} \|f_t - f^*\|_n^2 \gtrsim \sup_{f \in \mathcal{B}} \|E_\epsilon f_t - f^*\|_n^2 \gtrsim \frac{1}{\eta_t} \gg \frac{1}{\eta_{\tilde{T}}}.$$

We next prove Theorem 4.2 (b) for EDK. Similar to the proof of Theorem 4.2 (a), we construct the coefficients  $\{\alpha_\nu\}_{\nu=1}^n$  as

$$\alpha_\nu^2 = \begin{cases} \frac{C}{2n} \mu_{\check{\kappa}_t+1}^{-1} & \text{for } \nu = \check{\kappa}_t + 1; \\ 0 & \text{otherwise.} \end{cases} \quad (\text{A.12})$$

Then, it is easy to see that, conditional on  $\mathcal{A}$ ,  $\|f\|_{\mathcal{H}}^2 = n\alpha^\top D\alpha \leq C$ . Equation (A.11) also holds in EDK.  $W_1 = \|E_\epsilon f_t - f^*\|_n^2$  can be lower bounded as follows

$$W_1 \geq n \sum_{i=1}^n \alpha_i^2 \hat{\mu}_i^2 (1 - \min\{1, \eta_t \hat{\mu}_i\})^2 \geq \frac{n}{4} \alpha_{\check{\kappa}_t+1}^2 \hat{\mu}_{\check{\kappa}_t+1}^2 \geq \frac{C}{8} \hat{\mu}_{\check{\kappa}_t+1} \geq \frac{C}{16} \mu_{\check{\kappa}_t+1} \gg \mu_{\kappa_{\tilde{T}}} > \frac{1}{\eta_{\tilde{T}}},$$

where the second to last step is based on  $\check{\kappa}_t + 1 \ll \kappa_{\tilde{T}}$ , which will be shown in the following. By the definition of  $\check{\kappa}_t$ ,  $\mu_{\check{\kappa}_t} > \frac{1}{3\eta_t}$ , then  $\check{\kappa}_t < (\frac{\log 3\eta_t}{\beta})^{1/p}$  by plugging in  $\mu_i \asymp \exp(-\beta i^p)$ . Similarly,  $\kappa_{\tilde{T}} > (\frac{\log \eta_{\tilde{T}}}{\beta})^{1/p} - 1$ . By Assumption A2, as  $t \ll \tilde{T}$ ,  $\eta_t \ll \eta_{\tilde{T}} = n/(\log n)^{1/p}$  with  $n$  diverges, we have

$$\check{\kappa}_t + 1 < (\frac{\log 3\eta_t}{\beta})^{1/p} + 1 \ll (\frac{\log \eta_{\tilde{T}}}{\beta})^{1/p} - 1 < \kappa_{\tilde{T}}.$$

The analysis of  $W_2$  and  $W_3$  are as the same in the proof of Theorem 4.2 (a). Finally we have with probability approaching 1,

$$\sup_{f \in \mathcal{B}} \|f_t - f^*\|_n^2 \gtrsim \sup_{f \in \mathcal{B}} \|E_\epsilon f_t - f^*\|_n^2 \gg \frac{1}{\eta_{\tilde{T}}}.$$

□

We provide the following lemma to bound the variance of  $f_t$ .

**Lemma A.1.** Suppose Assumption A2 is satisfied. Then for  $t = 1, 2, \dots$ , it holds that

$$\|f_t - E_\epsilon f_t\|_n^2 = \mathcal{O}_P(\mu_{n,t})$$

where  $\mu_{n,t} \asymp \frac{1}{n} \sum_{i=1}^n \min\{1, \eta_t \hat{\mu}_i\}$ .

*Proof.* First, by (A.3) and the fact that  $\mathbf{f}_t = \sqrt{n}U\gamma^t$ , we have  $E_\epsilon \mathbf{f}_t = (I_n - S^t)\mathbf{f}^*$ . Thus the squared bias  $\|E_\epsilon f_t - f^*\|_n^2 = \|S^t \mathbf{f}^*\|_n^2 = \|S^t \gamma^*\|_2^2$ . By Lemma A.3,  $\|E_\epsilon f_t - f^*\|_n^2 \leq \frac{C}{\epsilon \eta_t}$ . Next, we consider the variance  $\|f_t - E_\epsilon f_t\|_n^2$ . Note that  $\|f_t - E_\epsilon f_t\|_n^2 = \frac{\epsilon^\top}{\sqrt{n}} (I - S^t)^2 \frac{\epsilon}{\sqrt{n}}$ , where  $\|\frac{\epsilon}{\sqrt{n}}\|_{\psi_2} \leq \frac{L}{\sqrt{n}}$  and  $\|(I - S^t)^2\|_{\text{op}} \leq 1$ . Recall  $\|\cdot\|_{\psi_2}$  is the sub-Gaussian norm defined as  $\|\epsilon\|_{\psi} = \sup_{p \geq 1} p^{-1/2} (E|\epsilon|^p)^{1/p}$ . Here  $\|\epsilon\|_{\psi_2} \leq L$ , with  $L$  as an absolute constant. Then by Hanson-Wright concentration inequality (Rudelson and Vershynin [2013]),

$$\begin{aligned} & \mathbb{P}\left(\|f_t - E_\epsilon f_t\|_n^2 - E_\epsilon \|f_t - E_\epsilon f_t\|_n^2 \geq \frac{\text{tr}((I - S^t)^2)}{2n} \mid \mathbf{x}\right) \\ &= \mathbb{P}\left(\frac{1}{n} \epsilon^\top (I - S^t)^2 \epsilon - \frac{\text{tr}((I - S^t)^2)}{n} \geq \frac{\text{tr}((I - S^t)^2)}{2n} \mid \mathbf{x}\right) \\ &\leq \exp\left(-c \min\left(\frac{\text{tr}^2((I - S^t)^2)}{4K^4 \|(I - S^t)^2\|_{\text{F}}^2}, \frac{\text{tr}((I - S^t)^2)}{\|(I - S^t)^2\|_{\text{op}}}\right)\right) \\ &\leq \exp(-c \text{tr}((I - S^t)^2)), \end{aligned}$$

where  $\|\cdot\|_{\text{F}}$  is the Frobenius norm. The last inequality holds by the fact that  $\|(I - S^t)^2\|_{\text{F}}^2 \leq \|(I - S^t)^2\|_{\text{op}} \text{tr}((I - S^t)^2)$  and  $\|(I - S^t)^2\|_{\text{op}} \leq 1$ . Lastly, by (A.5),  $\text{tr}((I - S^t)^2) \geq \frac{\check{\kappa}_t}{24}$ , which goes to  $+\infty$  as  $t \rightarrow \infty$ . Then we have, with probability approaching 1,  $\|f_t - E_\epsilon f_t\|_n^2 \leq \frac{3}{2} \mu_{n,t}$ .

□

## A.6 Proof of Lemma 5.1

*Proof.* Note that  $\text{tr}((\Lambda + \lambda I_n)^{-1} \Lambda)^4 \asymp \text{tr}(I - S^t)^4$  is equivalent to  $\text{tr}((\Lambda + \lambda I_n)^{-1} \Lambda) \asymp \text{tr}(I - S^t)$ . Let  $\kappa_\lambda = \text{argmin}\{j : \hat{\mu}_j \leq \lambda\} - 1$ , then

$$\text{tr}((\Lambda + \lambda I_n)^{-1} \Lambda) = \sum_{i=1}^{\kappa_\lambda} \frac{\hat{\mu}_i}{\hat{\mu}_i + \lambda} + \sum_{i=\kappa_\lambda+1}^n \frac{\hat{\mu}_i}{\hat{\mu}_i + \lambda}$$

For  $i \leq \kappa_\lambda$ , we have  $0 < \lambda < \hat{\mu}_i$ , then  $\frac{1}{2} \kappa_\lambda \leq \sum_{i=1}^{\kappa_\lambda} \frac{\hat{\mu}_i}{\hat{\mu}_i + \lambda} \leq \kappa_\lambda$ . For  $i > \kappa_\lambda$ , we have  $0 \leq \hat{\mu}_i < \lambda$ , then  $\frac{1}{2\lambda} \sum_{i=\kappa_\lambda+1}^n \hat{\mu}_i \leq \sum_{i=\kappa_\lambda+1}^n \frac{\hat{\mu}_i}{\hat{\mu}_i + \lambda} \leq \frac{1}{\lambda} \sum_{i=\kappa_\lambda+1}^n \hat{\mu}_i$ . Therefore,

$$\text{tr}((\Lambda + \lambda I_n)^{-1} \Lambda) \asymp \kappa_\lambda + \frac{1}{\lambda} \sum_{i=\kappa_\lambda+1}^n \hat{\mu}_i \asymp \sum_{i=1}^n \min\{1, \frac{1}{\lambda} \hat{\mu}_i\}.$$

On the other hand, by Lemma A.2, we have  $\text{tr}(I - S^t) \asymp \sum_{i=1}^n \min\{1, \eta_t \hat{\mu}_i\}$ . Then, it is obvious that  $\text{tr}((\Lambda + \lambda I_n)^{-1} \Lambda) \asymp \text{tr}(I - S^t)$  holds if and only if  $\lambda \asymp \frac{1}{\eta_t}$ .  $\square$

## A.7 Some auxiliary lemmas

**Lemma A.2** (Raskutti et al. [2014] Property of Shrinkage matrices  $S^t$ ). *For all indices  $j \in \{1, 2, \dots, n\}$ , the shrinkage matrices  $S^t$  satisfy the bounds*

$$0 \leq (S^t)_{jj}^2 \leq \frac{1}{2e\eta_t \hat{\mu}_j}, \quad \text{and} \\ \frac{1}{2} \min\{1, \eta_t \hat{\mu}_j\} \leq 1 - S_{jj}^t \leq \min\{1, \eta_t \hat{\mu}_j\}$$

**Lemma A.3** (Raskutti et al. [2014] Bounding the squared bias).  $\|S^t \gamma^*\|_2^2 \leq \frac{C}{e\eta_t}$ , where  $C$  is the constrain that  $\|f\|_{\mathcal{H}} \leq C$ .

**Lemma A.4** (Liu et al. [2018]). *For  $t \geq 0$ , if  $\eta_t < n$ , then with probability at least  $1 - 4e^{-\kappa_t}$ ,  $\sum_{i=\hat{\kappa}_t+1}^n \hat{\mu}_i \leq C \kappa_t \mu_{\kappa_t}$ , where  $C > 0$  is an absolute constant.*

**Lemma A.5** (Liu et al. [2018] Properties of eigenvalues). (a) *Suppose that  $K$  has eigenvalues satisfying  $\mu_i \asymp i^{-2m}$  with  $m > 3/2$ . Then for  $i = 1, \dots, n^{1/(2m)}$ ,*

$$P\left(|\hat{\mu}_i - \mu_i| \leq \frac{1}{2} \mu_i\right) \geq 1 - e^{-c_m n i^{-4m/(2m-1)}}.$$

where  $c_m$  is an universal constant depending only on  $m$ .

(b) *Suppose that  $K$  has eigenvalues satisfying  $\mu_i \asymp \exp(-\beta i^p)$  with  $\beta > 0$ ,  $p \geq 1$ . Then for  $i = o(n^{1/2})$ ,*

$$P(|\hat{\mu}_i - \mu_i| \leq \frac{1}{2} \mu_i) \geq 1 - e^{-c_{\beta,p} n i^{-2}},$$

where  $c_{\beta,p}$  is an universal constant depending only on  $\beta$  and  $p$ .

For  $i = O(n^{1/2})$ , we have

$$P(|\hat{\mu}_i - \mu_i| \leq i \mu_i) \geq 1 - e^{-c'_{\beta,p} n},$$

where  $c'_{\beta,p}$  is an universal constant depending only on  $\beta$  and  $p$ .

## A.8 Additional Numerical study

In this section, we further compare our testing method (ES) with an oracle version of stopping rule (oracle ES) that uses knowledge of  $f^*$ , as well as the test based on the penalized regularization.

Data were generated from the regression model (2.1) with  $f(x_i) = c(0.8(x_i - 0.5)^2 + 0.2 \sin(4\pi x_i))$ , where  $x_i \stackrel{iid}{\sim} \text{Unif}[0, 1]$  and  $c = 0, 0.5, 0.8, 1, 1.2$  respectively.  $c = 0$  is used for examining the size of the test, and  $c > 0$  is used for examining the power of the test. The sample size  $n$  is ranged from

100 to 1000. We use the second-order Sobolev kernel with polynomial eigen-decay (i.e.,  $m = 2$ ) to fit the data. Significance level was chosen as 0.05. Both size and power were calculated as the proportions of rejections based on 500 independent replications. For the ES, we use bootstrap method to approximate the bias with  $B = 10$  and the step size  $\alpha = 1$ . For the penalization-based test, we use 10-fold cross validation (10-fold CV) to select the penalty parameter. For the oracle ES, we follow the stopping rule in Section 5.1 with constant step size  $\alpha = 1$ . The power increases when the nonparametric signal  $c$  increases for  $c > 0$ . Overall, the interpretations are similar to Figure 2 for EDK in Section 5.1.

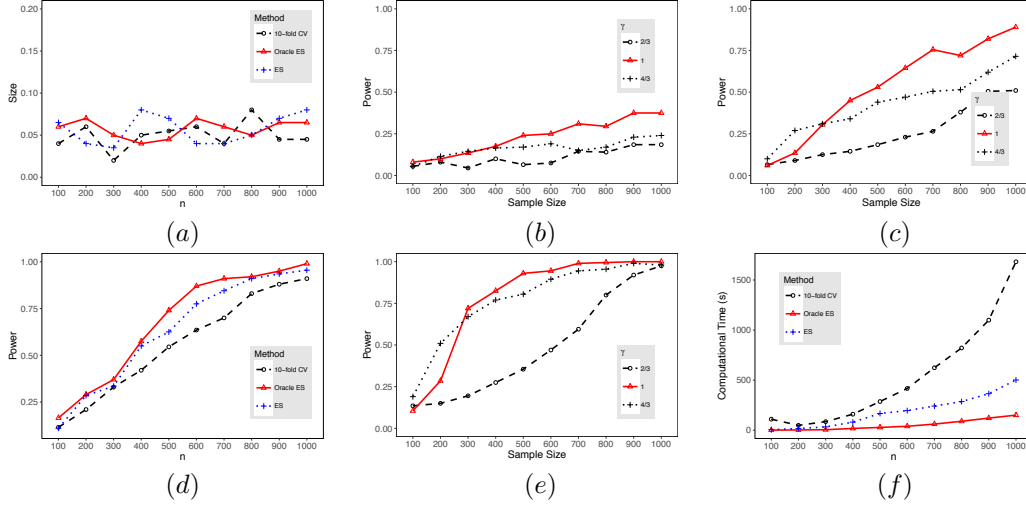

Figure 4: (a) is the size with signal strength  $c = 0$ ; (b) is the power with signal strength  $c = 0.5$ ; (c) is the power with  $c = 0.8$ ; (d) is the power with  $c = 1.0$ ; (e) is the power with  $c = 1.2$ ; (f) is the computational time (in seconds) for the three testing rules.

## References

- Peter Bühlmann and Bin Yu. Boosting with the  $l_2$  loss: regression and classification. *Journal of the American Statistical Association*, 98(462):324–339, 2003.
- Petros Drineas and Michael W Mahoney. On the nystrom method for approximating a gram matrix for improved kernel-based learning. *journal of machine learning research*, 6(Dec):2153–2175, 2005.
- Jianqing Fan and Jiancheng Jiang. Nonparametric inference with generalized likelihood ratio tests. *TEST*, 16(3):409–444, Dec 2007. ISSN 1863-8260.
- Jianqing Fan, Chunming Zhang, and Jian Zhang. Generalized likelihood ratio statistics and wilks phenomenon. *The Annals of statistics*, 29(1):153–193, 2001.
- Gene H Golub, Michael Heath, and Grace Wahba. Generalized cross-validation as a method for choosing a good ridge parameter. *Technometrics*, 21(2):215–223, 1979.
- Wensheng Guo. Inference in smoothing spline analysis of variance. *Journal of the Royal Statistical Society: Series B (Statistical Methodology)*, 64(4):887–898, 2002.
- Yuri I Ingster. Asymptotically minimax hypothesis testing for nonparametric alternatives. i, ii, iii. *Mathematical Methods of Statistics*, 2(2):85–114, 1993.
- Meimei Liu, Zuofeng Shang, and Guang Cheng. Nonparametric testing under random projection. *arXiv preprint arXiv:1802.06308*, 2018.
- Junwei Lu, Guang Cheng, and Han Liu. Nonparametric heterogeneity testing for massive data. *arXiv preprint arXiv:1601.06212*, 2016.



- Siyuan Ma and Mikhail Belkin. Diving into the shallows: a computational perspective on large-scale shallow learning. In *Advances in Neural Information Processing Systems*, pages 3781–3790, 2017.
- Garvesh Raskutti, Martin J Wainwright, and Bin Yu. Early stopping and non-parametric regression: an optimal data-dependent stopping rule. *Journal of Machine Learning Research*, 15(1):335–366, 2014.
- Mark Rudelson and Roman Vershynin. Hanson-wright inequality and sub-gaussian concentration. *Electronic Communications in Probability*, 18(82):1–9, 2013.
- Bernhard Schölkopf, Christopher JC Burges, and Alexander J Smola. *Advances in kernel methods: support vector learning*. MIT press, 1999.
- Zuofeng Shang and Guang Cheng. Local and global asymptotic inference in smoothing spline models. *The Annals of Statistics*, 41(5):2608–2638, 2013.
- John Shawe-Taylor and Nello Cristianini. *Kernel methods for pattern analysis*. Cambridge university press, 2004.
- Gilbert W Stewart. A krylov–schur algorithm for large eigenproblems. *SIAM Journal on Matrix Analysis and Applications*, 23(3):601–614, 2002.
- Grace Wahba. *Spline models for observational data*. SIAM, 1990.
- Yuting Wei and Martin J Wainwright. The local geometry of testing in ellipses: Tight control via localized kolmogorov widths. *arXiv preprint arXiv:1712.00711*, 2017.
- Yuting Wei, Fanny Yang, and Martin J Wainwright. Early stopping for kernel boosting algorithms: A general analysis with localized complexities. In *Advances in Neural Information Processing Systems*, pages 6067–6077, 2017.
- Yuan Yao, Lorenzo Rosasco, and Andrea Caponnetto. On early stopping in gradient descent learning. *Constructive Approximation*, 26(2):289–315, 2007.
- Tong Zhang and Bin Yu. Boosting with early stopping: Convergence and consistency. *The Annals of Statistics*, 33(4):1538–1579, 2005.
